# Supplementary material for: Phenolic content, chemical composition and anti-/pro-oxidant activity of Gold Milenium and Papierowka apple peel extracts
Source: PubMed Central journal article supplement (PMC7486935; doi:10.1038/s41598-020-71351-w), 2020-09-11
Supplement: 41598_2020_71351_MOESM1_ESM.pdf [file 41598_2020_71351_MOESM1_ESM.pdf]

## Supplementary data

**Chemical composition, anti-/pro-oxidant activity of apple peel extracts - environmental friendly source of bioactive compounds with possible application in agricultural, food and pharmaceutical industries**

Monika Kalinowska<sup>a\*</sup>, Kamila Gryko<sup>a</sup>, Anna M. Wróblewska<sup>b</sup>, Agata Jabłońska-Trypuć<sup>a</sup>, Danuta Karpowicz<sup>a</sup>

<sup>a</sup> Department of Chemistry, Biology and Biotechnology, Białystok University of Technology, Wiejska 45A, 15-351 Białystok, Poland

<sup>b</sup> Faculty of Chemistry, Warsaw University of Technology, Noakowskiego 3, 00-664 Warsaw, Poland

---

\* CONTACT: Monika Kalinowska, e-mail: [m.kalinowska@pb.edu.pl](mailto:m.kalinowska@pb.edu.pl); address: Department of Chemistry, Biology and Biotechnology, Białystok University of Technology, Białystok, Poland

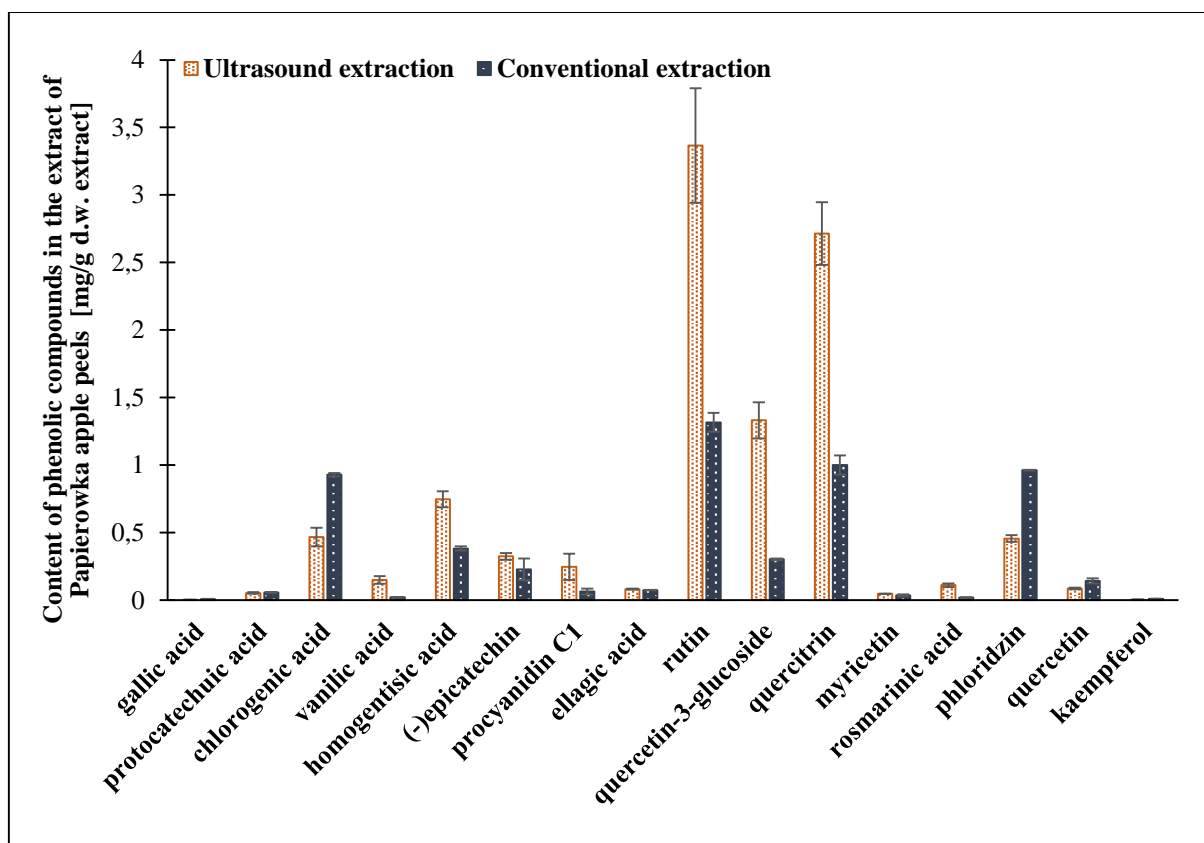

**Figure S1.** The content of particular phenolic compounds in Papierowka apple peel extract. Mean values from three independent experiments  $\pm$  SD are shown.

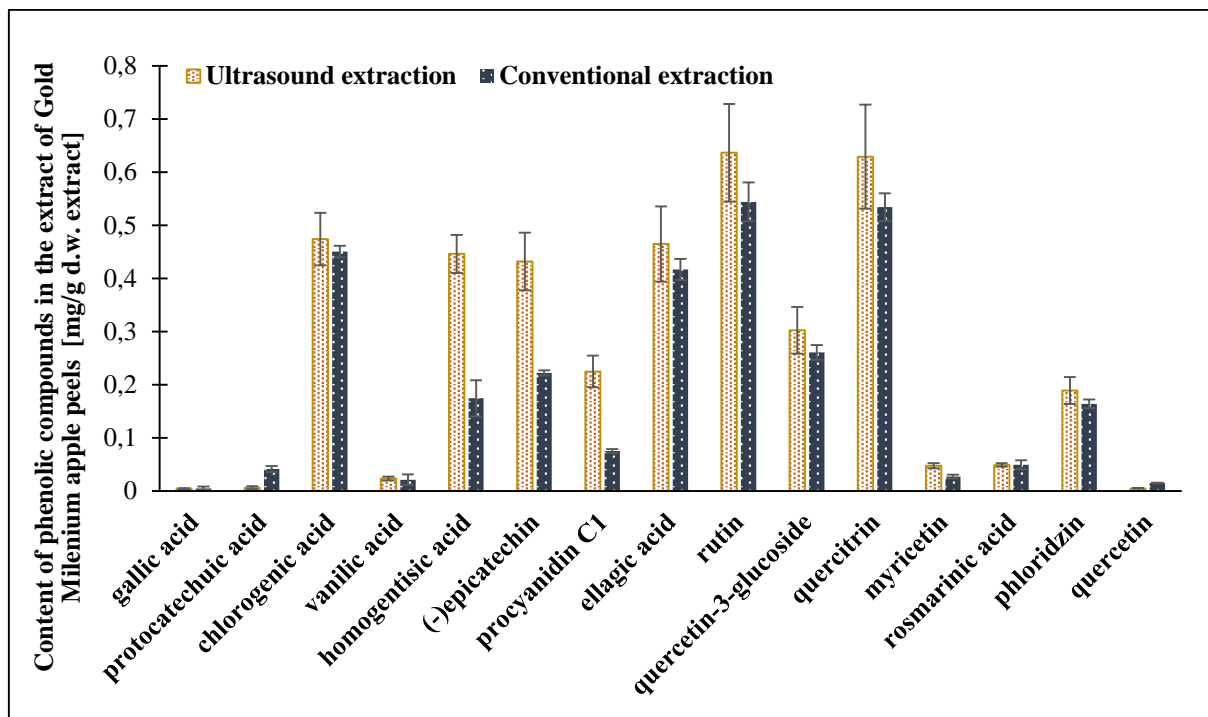

**Figure S2.** The content of particular phenolic compounds in Gold Milenium apple peel extract. Mean values from three independent experiments  $\pm$  SD are shown.
